# Supplementary material for: Fe0 and Fe0 fully covered with Cu0 (Fe0 + Fe/Cu) in a fixed bed reactor for nitrate removal
Source: Royal Society of Chemistry journal article supplement (doi:10.1039/c6ra24014c), 2016-01-01
Supplement: c6ra24014c1.pdf [file c6ra24014c1.pdf]

**Supporting Information for**

**Fe<sup>0</sup> and Fe<sup>0</sup> fully covered with Cu<sup>0</sup> (Fe<sup>0</sup>+Fe/Cu) in fixed bed reactor  
for nitrate removal**

Yi Ren, Jinfan Zhou, Bo Lai\*, Wenjing Tang, Yan Zeng

*Department of Environmental Science and Engineering, School of Architecture and Environment, Sichuan  
University, Chengdu 610065, China*

\* Corresponding author. Tel/fax: +86 18682752302; E-mail: laibo@scu.edu.cn

Submitted to

**RSC Advances**

**Summary:**

Page 2: Fig.S1

---

\* Corresponding authors. Tel./fax: +86 18682752302  
E-mail address: [laibo@scu.edu.cn](mailto:laibo@scu.edu.cn) (Bo Lai)

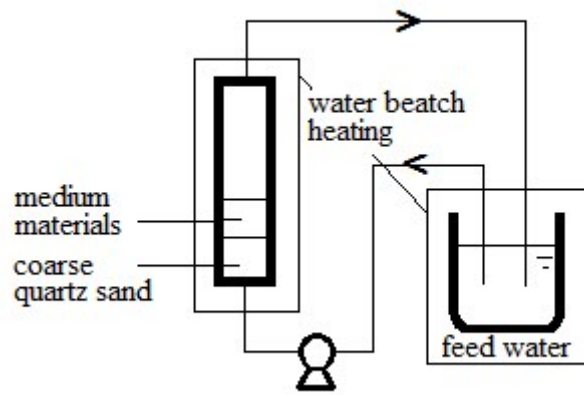

**Fig.S1. The configuration of reactor.**
